# Supplementary material for: Functional identification of soluble uric acid as an endogenous inhibitor of CD38
Source: eLife. 2024 Nov 11;13:RP96962. doi: 10.7554/eLife.96962 (PMC11554305; doi:10.7554/eLife.96962)
Supplement: Supplementary file 2. [file elife-96962-supp2.xlsx]

## Sheet: Sheet1
						In Figure 1A (right panel), Figure 2D (left panel), Figure 2E, Figure 2-figure supplement 1A, Figure 2-figure supplement 1D, and Figure 2-figure supplement 1E, the ligands (or different types of enzyme activity) were tested separately. The data of the control groups with variation for these ligands were not shown in the figures but were provided in this file.
	Figure 1A			ctrl means control
	data not shown
	hydrolase ctrl	cyclase ctrl
	0.97881	0.97516
	1.00424	0.97159
	1.01695	1.05326
	Figure 2D						Figure 2E
	data not shown in D (left panel)						data not shown in E
	hydrolase ctrl						uracil (tested with the ligands in B) ctrl			1,3-DHI-2-one ctrl
	oxypurinol	cafeine	1-MU	1,3-DMU			hydrolase	cyclase		hydrolase	cyclase
	1.00117	0.97329	0.96369	1.05005			1.02098	1.11336		1.08513	1.01001
	0.9281	1.01404	1.00559	1.02268			1.01612	1.01221		0.88963	0.96633
	1.07072	1.01267	1.03072	0.92727			0.9629	0.84344		1.02524	1.02366
								1.03233
	cyclase ctrl							0.99866
	for ligands at 5 μM		for ligands at 500 μM
	0.99082			1.01387
	1.07342			1.10277
	0.93576			0.88336
	Figure 2-figure supplement 1A											Figure 2-figure supplement 1D and 1E
	data not shown in A											data not shown in D and E
	ctrl for hypoxanthine and xanthine				ctrl for allantoin			ctrl for inosine and sUA				uracil (tested with the ligands in B and C)					1,3-DHI-2-one
	0.96535				1.06707			0.97162				hydrolase ctrl		cyclase ctrl			hydrolase ctrl		cyclase ctrl
	1.03881				0.95732			1.02656				1.06796		0.97856			0.95677		0.99783
	0.99584				0.97561			1.00182				1.00971		0.98194			1.00791		1.01018
												0.92233		1.03949			1.03532		0.99199
